# Supplementary material for: Prognostic score to predict mortality during TB treatment in TB/HIV co-infected patients
Source: PubMed Central journal article supplement (PMC5901929; doi:10.1371/journal.pone.0196022), 2018-04-16
Supplement: pone.0196022.s001.pdf [file pone.0196022.s001.pdf]

**S1 Table. Demographics, clinical characteristics and outcome between patients included**

**(n=434) versus excluded from the multiple logistic regression model (n=16)**

|                                             | <b>Total<br/>(N = 450)</b> | <b>Excluded<br/>(n= 16)</b> | <b>Included<br/>(n= 434)</b> | <b>p-value*</b> |
|---------------------------------------------|----------------------------|-----------------------------|------------------------------|-----------------|
| <b>Age (years)</b>                          |                            |                             |                              | 0.14            |
| 15-44                                       | 256 (56.9%)                | 12 (75.0%)                  | 244 (56.2%)                  |                 |
| ≥45                                         | 194 (43.1%)                | 4 (25.0%)                   | 190 (43.8%)                  |                 |
| <b>Gender</b>                               |                            |                             |                              | 0.16            |
| Female                                      | 104 (23.1%)                | 6 (37.5%)                   | 98 (22.6%)                   |                 |
| Male                                        | 346 (76.9%)                | 10 (62.5%)                  | 336 (77.4%)                  |                 |
| <b>Race/Ethnicity</b>                       |                            |                             |                              | 0.62            |
| White                                       | 44 (9.8%)                  | 0 (0.0%)                    | 44 (10.1%)                   |                 |
| Black                                       | 216 (48.0%)                | 8 (50.0%)                   | 208 (47.9%)                  |                 |
| Hispanic                                    | 174 (38.7%)                | 8 (50.0%)                   | 166 (38.2%)                  |                 |
| Asian                                       | 14 (3.1%)                  | 0 (0.0%)                    | 14 (3.2%)                    |                 |
| Other                                       | 2 (0.4%)                   | 0 (0.0%)                    | 2 (0.5%)                     |                 |
| <b>US-born</b>                              |                            |                             |                              | 0.81            |
| No                                          | 184 (40.9%)                | 7 (43.8%)                   | 177 (40.8%)                  |                 |
| Yes                                         | 266 (59.1%)                | 9 (56.3%)                   | 257 (59.2%)                  |                 |
| <b>Resident of long-term care facility</b>  |                            |                             |                              | 1.00            |
| No                                          | 443 (98.4%)                | 16 (100.0%)                 | 427 (98.4%)                  |                 |
| Yes                                         | 7 (1.6%)                   | 0 (0.0%)                    | 7 (1.6%)                     |                 |
| <b>Chronic kidney failure</b>               |                            |                             |                              | 1.00            |
| No                                          | 443 (98.4%)                | 16 (100.0%)                 | 427 (98.4%)                  |                 |
| Yes                                         | 7 (1.6%)                   | 0 (0.0%)                    | 7 (1.6%)                     |                 |
| <b>Meningeal TB</b>                         |                            |                             |                              | 0.31            |
| No                                          | 424 (94.2%)                | 16 (100.0%)                 | 408 (94.0%)                  |                 |
| Yes                                         | 26 (5.8%)                  | 0 (0.0%)                    | 26 (6.0%)                    |                 |
| <b>TB-CXR</b>                               |                            |                             |                              | NA              |
| No                                          | 62 (14.3%)                 | 0 (0.0%)                    | 62 (14.3%)                   |                 |
| Yes                                         | 372 (85.7%)                | 0 (0.0%)                    | 372 (85.7%)                  |                 |
| <b>TB case verified by</b>                  |                            |                             |                              | 0.21            |
| Clinical case definition/provider diagnosis | 81 (18.0%)                 | 1 (6.3%)                    | 80 (18.4%)                   |                 |
| Positive culture, NAA or smear              | 369 (82.0%)                | 15 (93.8%)                  | 354 (81.6%)                  |                 |
| <b>Patient outcome</b>                      |                            |                             |                              | 0.46            |
| Treatment completed                         | 393 (87.3%)                | 13 (81.3%)                  | 380 (87.6%)                  |                 |
| Dead                                        | 57 (12.7%)                 | 3 (18.8%)                   | 54 (12.4%)                   |                 |

Note: Values are in number and % unless otherwise specified; \*differences across groups were

compared using the Chi-square or Fisher's exact tests as appropriate. TB-CXR: TB-specific

abnormalities on chest radiograph. NAA, Nucleic Acid Amplification.
